# Supplementary material
Source: PubMed Central journal article supplement (PMC17667)
Supplement: pnas_97_25_13865__1.pdf [file pnas_97_25_13865__1.pdf]

Supplementary material for Purser and Norris (2000) *Proc. Natl. Acad. Sci. USA* **97** (25), 13865-13870.

**Table 3.** Primer sequences, amplicon coordinates, and  $T_m$  information for specific PCR amplification of *Borrelia burgdorferi* B31 plasmids

| Plasmid            | Primer | Sequence                                     | Amplicon coordinates | Corresponding gene(s)                                                                                                                                 | $T_m$ , °C* |
|--------------------|--------|----------------------------------------------|----------------------|-------------------------------------------------------------------------------------------------------------------------------------------------------|-------------|
| cp9                | F-4568 | 5' GGA CTG GTA TTT ACT CCG GCT GAT AGA GC 3' | 6372-6650            | BBC10 rev protein ( <i>rev</i> ) (6808-6284)                                                                                                          | 64.3        |
|                    | R-4569 | 5' CCT TAA TGA TGA GGC CGA TGA AGT TGC 3'    |                      |                                                                                                                                                       | 62.0        |
| cp26               | F-4536 | 5' ATA GCC CAT TCC AGA CAT TAA ACC GCC T 3'  | 14001-14394          | BBB17 <i>guaB</i> (15107-13896)                                                                                                                       | 73.0        |
|                    | R-4537 | 5' AGT TCC CCA AAT AAC AGC AAT CTG CGA 3'    |                      |                                                                                                                                                       | 72.9        |
| cp32-1             | F-4571 | 5' ACG ATA GGG TAA TAT CAA AAA AGG 3'        | 21583-22054          | BBP33 conserved hypothetical protein (21510-22115)                                                                                                    | 53.1        |
|                    | R-4572 | 5' AGT TCA TCT AAT AAA AAT CCC GTG 3'        |                      |                                                                                                                                                       | 53.5        |
| cp32-2 and cp32-7† | F-4577 | 5' GGA ATG TAT TAA TTG ATA ATT CAG 3'        | 20986-21360          | BBO32 plasmid partition protein, putative (20766-21512)                                                                                               | 47.7        |
|                    | R-4578 | 5' GCG AAC TAA ATA GTG CCT TAT GGG 3'        |                      |                                                                                                                                                       | 58.0        |
| cp32-3             | F-4529 | 5' GCA AGT TCC CAC GAT AAC ACA CCC GTA T 3'  | 26897-27416          | <i>ospG-bapA</i> (26708-27295, 27410-27916)                                                                                                           | 73.7        |
|                    | R-4530 | 5' TTT TCA TAT CCC CTC CTA GCT TTA TTG CC 3' |                      |                                                                                                                                                       | 70.1        |
| cp32-6             | F-4575 | 5' GAC TTT ACA TAG TAT AAA TGC TTT TGG 3'    | 21008-21281          | BBM32 plasmid partition protein, putative (20721-21467)                                                                                               | 53.5        |
|                    | R-4576 | 5' TCT CGT TAT TAT AAA ATA AGT AGG 3'        |                      |                                                                                                                                                       | 48.0        |
| cp32-8             | F-4579 | 5' GAA GAT TTA AAC AAA AAA ATT GCG 3'        | 21376-21610          | BBL32 plasmid partition protein, putative (20740-21477), BBL33 hypothetical protein (21467-21556), BBL34 conserved hypothetical protein (21540-22097) | 50.7        |

| Plasmid               | Primer | Sequence                                    | Amplicon coordinates | Corresponding gene(s)                                                                                       | $T_m$ , °C* |
|-----------------------|--------|---------------------------------------------|----------------------|-------------------------------------------------------------------------------------------------------------|-------------|
|                       | R-4580 | 5' GTA ATC ACT TCT TTT TTA CCA TCG 3'       |                      |                                                                                                             | 52.9        |
| cp32-9                | F-4581 | 5' TAT CAA AAA AGT GCT GTT TTA TAG 3'       | 21473-21721          | BBN32 plasmid partition protein, putative (20817-21569), BBN33 conserved hypothetical protein (21614-22171) | 50.2        |
|                       | R-4582 | 5' TAA TCT CAA ATA TTC TTC TTT ATG 3'       |                      |                                                                                                             | 46.2        |
| lp17                  | F-4507 | 5' ACT GCA ATC TGC CCA AGC TAC ATA ATC T 3' | 7657-7939            | BBD12 hypothetical protein-BBD13 hypothetical protein ( <i>Bb</i> ) (7752-7624, 7787-8110)                  | 69.7        |
|                       | R-4508 | 5' AAG GTA AGG ACG GTT GTC TAC ATG GAT T 3' |                      |                                                                                                             | 68.7        |
| lp21                  | F-4562 | 5' TGT GGT TGC TAA AAC CCA AGC GT 3'        | 14905-15520          | BBU06 conserved hypothetical protein-BBU07 conserved hypothetical protein (14633-15232, 15349-15810)        | 63.1        |
|                       | R-4563 | 5' TTG TTT CTA ATT GCT CTG AAT TGC ATC C 3' |                      |                                                                                                             | 58.8        |
| lp25                  | F-4511 | 5' AGA ATT ATG TCG GTG GCG TTG T 3'         | 14663-14921          | BBE21.1 transposase-related protein, pseudogene ( <i>Bb</i> ) 14767-14893                                   | 66.3        |
|                       | R-4484 | 5' ATT AAA GCC GCC TTT TCC TTG GT 3'        |                      |                                                                                                             | 68.1        |
| lp25 (secondary site) | F-4596 | 5' TTG CTG CCA TTT CTC ACT TGG TAA 3'       | 9783-9959            | BBE16 hypothetical protein (10187-9570)                                                                     | 65.0        |
|                       | R-4597 | 5' ATA AAA GCG ACA GGT TAT CGT GCA G 3'     |                      |                                                                                                             | 64.6        |

| Plasmid                 | Primer | Sequence                                             | Amplicon coordinates | Corresponding gene(s)                                      | $T_m$ , °C* |
|-------------------------|--------|------------------------------------------------------|----------------------|------------------------------------------------------------|-------------|
| lp28-1                  | F-4340 | 5' CGG GGA TCC AGC CAA GTT GCT GAT AAG GAC GAC CC 3' | (149 bp)             | <i>vlsE</i> upstream conserved region                      | 71.9        |
|                         | R-4084 | 5' ACG GCA GTT CCA ACA GAA CCT GTA CTA TCT 3'        |                      |                                                            | 64.6        |
| lp28-1 (secondary site) | F-4598 | 5' TTC TGA TGG CAC TGA GCA AAC CA 3'                 | 1309-1457            | BBF01 Erp D protein, putative (47-1462)                    | 67.3        |
|                         | R-4599 | 5' AAC CCT TTA CAC TTT CTT CGA TTG CGC T 3'          |                      |                                                            | 69.2        |
| lp28-2                  | F-4523 | 5' CCC TCA TCA AGT TTT TCC ATG TGT TTT T 3'          | 13824-14276          | BBG17 hypothetical protein (14341-13511)                   | 69.7        |
|                         | R-4524 | 5' AGG TGG CCT TTC CGA GCT TGT ACC TTA C 3'          |                      |                                                            | 73.2        |
| lp28-3                  | F-4534 | 5' AAC ACT ATC TTA AAT GTC CCC CAC AA 3'             | 11570-11901          | BBH17 hypothetical protein (11837-12025)                   | 66.0        |
|                         | R-4535 | 5' GTG GAA GAG TGG TTA TGG TCA ATT TT 3'             |                      |                                                            | 65.7        |
| lp28-4                  | F-4525 | 5' TCA CCT CAG CTA ATC TAT TTA TCG ACA C 3'          | 9005-9219            | putative noncoding region                                  | 65.1        |
|                         | R-4526 | 5' AAG CGC GGA GTT TTC GGC TG 3'                     |                      |                                                            | 72.4        |
| lp36                    | F-4518 | 5' TTC TTA TCC CTG ACT TTC ACT TTT GAG G 3'          | 7247-7627            | BBK12 hypothetical protein (7335-8030)                     | 67.7        |
|                         | R-4519 | 5' TCC TTT ACT TCT ATG TTT TTA CTT TCC TTG GT 3'     |                      |                                                            | 66.0        |
| lp38                    | F-4505 | 5' AGC A/GGC AGA ACA AAA CAT GCA AAA ACT G 3'        | 6541-6668            | BBJ09 <i>ospD</i> (6089-6859)                              | 71.8        |
|                         | R-4506 | 5' TCC AAG CTA TTT CTA CGG CCT CTT TAG C 3'          |                      |                                                            | 70.0        |
| lp54                    | F-4538 | 5' GCA AAA TGT TAG CAG CCT TGA CGA GAA A 3'          | 9446-9554            | BBA15 <i>ospA</i> (9393-10211)                             | 72.5        |
|                         | R-4539 | 5' TAG ATC GTA CTT GCC GTC TTT GTT TTT T 3'          |                      |                                                            | 67.8        |
| lp56                    | F-4566 | 5' ACT ATT AAG ACG AGC AAT AAA AAG TCC A 3'          | 42929-43524          | BBQ67 adenine specific DNA methyltransferase (43732-40439) | 57.7        |
|                         | R-4567 | 5' GAC GAA GCA AAG AAG GAT TTG GAT CAC C 3'          |                      |                                                            | 62.4        |

\*As calculated based on the nearest-neighbor thermodynamic parameter set of Allawi and SantaLucia (1) and a coefficient of 12.0 for the salt dependence.

†This primer set does not distinguish between cp32-2 and cp32-7.

Reference:

1. Allawi, H. T. & SantaLucia, J., Jr. (1997) *Biochemistry* **36**, 10581--10594.
